# Supplementary material for: Continuous reorganization of cortical information flow in multiple sclerosis: A longitudinal fMRI effective connectivity study
Source: Springer Nature journal article supplement (doi:10.1038/s41598-020-57895-x), 2020-01-21

# **Continuous reorganization of cortical information flow in multiple sclerosis:**

## **A longitudinal fMRI effective connectivity study**

Vinzenz Fleischer, MD<sup>1#</sup>, Muthuraman Muthuraman, PhD<sup>1#</sup>, Abdul Rauf Anwar, PhD<sup>2</sup>, Gabriel  
Gonzalez-Escamilla, PhD<sup>1</sup>, Angela Radetz, MSc<sup>1</sup>, René-Maxime Gracien, MD<sup>3</sup>, Stefan  
Bittner, MD<sup>1</sup>, Felix Lüssi, MD<sup>1</sup>, Sven G. Meuth, PhD, MD<sup>4</sup>, Frauke Zipp, MD<sup>1§</sup> and Sergiu  
Groppa, MD<sup>1§\*</sup>

# Supplement

**Supplementary Table S1.** Regions of interest included in the AAL-atlas and their affiliation to the seven investigated superordinate brain areas (merged regions) in the current study.

| <b>Superordinate brain region</b> | <b>AAL-based brain regions</b>                  | <b>Abbreviation</b> |
|-----------------------------------|-------------------------------------------------|---------------------|
| <b>DGMN (8)</b>                   |                                                 |                     |
|                                   | Caudate nucleus (left)                          | Caudate_L           |
|                                   | Caudate nucleus (right)                         | Caudate_R           |
|                                   | Lenticular nucleus, putamen (left)              | Putamen_L           |
|                                   | Lenticular nucleus, putamen (right)             | Putamen_R           |
|                                   | Lenticular nucleus, putamen (left)              | Pallidum_L          |
|                                   | Lenticular nucleus, putamen (right)             | Pallidum_R          |
|                                   | Thalamus (left)                                 | Thalamus_L          |
|                                   | Thalamus (right)                                | Thalamus_R          |
| <b>Frontal (22)</b>               |                                                 |                     |
|                                   | Precentral gyrus (left)                         | Precentral_L        |
|                                   | Precentral gyrus (right)                        | Precentral_R        |
|                                   | Superior frontal gyrus, dorsolateral (left)     | Frontal_Sup_L       |
|                                   | Superior frontal gyrus, dorsolateral (right)    | Frontal_Sup_R       |
|                                   | Middle frontal gyrus (left)                     | Frontal_Mid_L       |
|                                   | Middle frontal gyrus (right)                    | Frontal_Mid_R       |
|                                   | Middle frontal gyrus, orbital part (left)       | Frontal_Mid_Orb_L   |
|                                   | Middle frontal gyrus, orbital part (right)      | Frontal_Mid_Orb_R   |
|                                   | Inferior frontal gyrus, opercular part (left)   | Frontal_Inf_Oper_L  |
|                                   | Inferior frontal gyrus, opercular part (right)  | Frontal_Inf_Oper_R  |
|                                   | Inferior frontal gyrus, triangular part (left)  | Frontal_Inf_Tri_L   |
|                                   | Inferior frontal gyrus, triangular part (right) | Frontal_Inf_Tri_R   |

|                       |                                                |                      |
|-----------------------|------------------------------------------------|----------------------|
|                       | Inferior frontal gyrus, orbital part (left)    | Frontal_Inf_Orb_L    |
|                       | Inferior frontal gyrus, orbital part (right)   | Frontal_Inf_Orb_R    |
|                       | Gyrus rectus (left)                            | Rectus_L             |
|                       | Gyrus rectus (right)                           | Rectus_R             |
|                       | Rolandic operculum (left)                      | Rolandic_Oper_L      |
|                       | Rolandic operculum (right)                     | Rolandic_Oper_R      |
|                       | Supplementary motor area (left)                | Supp_Motor_Area_L    |
|                       | Supplementary motor area (right)               | Supp_Motor_Area_R    |
|                       | Superior frontal gyrus, medial orbital (left)  | Frontal_Med_Orb_L    |
|                       | Superior frontal gyrus, medial orbital (right) | Frontal_Med_Orb_R    |
| <b>Prefrontal (4)</b> |                                                |                      |
|                       | Superior frontal gyrus, orbital part (left)    | Frontal_Sup_Orb_L    |
|                       | Superior frontal gyrus, orbital part (right)   | Frontal_Sup_Orb_R    |
|                       | Superior frontal gyrus, medial (left)          | Frontal_Sup_Medial_L |
|                       | Superior frontal gyrus, medial (right)         | Frontal_Sup_Medial_R |
| <b>Temporal (22)</b>  |                                                |                      |
|                       | Heschl gyrus (left)                            | Heschl_L             |
|                       | Heschl gyrus (right)                           | Heschl_R             |
|                       | Superior temporal gyrus (left)                 | Temporal_Sup_L       |
|                       | Superior temporal gyrus (right)                | Temporal_Sup_R       |
|                       | Temporal pole: superior temporal gyrus (left)  | Temporal_Pole_Sup_L  |
|                       | Temporal pole: superior temporal gyrus (right) | Temporal_Pole_Sup_R  |
|                       | Middle temporal gyrus (left)                   | Temporal_Mid_L       |
|                       | Middle temporal gyrus (right)                  | Temporal_Mid_R       |
|                       | Temporal pole: middle temporal gyrus (left)    | Temporal_Pole_Mid_L  |
|                       | Temporal pole: middle temporal gyrus (right)   | Temporal_Pole_Mid_R  |
|                       | Inferior temporal gyrus (left)                 | Temporal_Inf_L       |
|                       | Inferior temporal gyrus (right)                | Temporal_Inf_R       |
|                       | Hippocampus (left)                             | Hippocampus_L        |
|                       | Hippocampus (right)                            | Hippocampus_R        |

|                      |                                                               |                      |
|----------------------|---------------------------------------------------------------|----------------------|
|                      | Parahippocampal gyrus (left)                                  | ParaHippocampal_L    |
|                      | Parahippocampal gyrus (right)                                 | ParaHippocampal_R    |
|                      | Amygdala (left)                                               | Amygdala_L           |
|                      | Amygdala (right)                                              | Amygdala_R           |
|                      | Insula (left)                                                 | Insula_L             |
|                      | Insula (right)                                                | Insula_R             |
|                      | Olfactory cortex (left)                                       | Olfactory_L          |
|                      | Olfactory cortex (right)                                      | Olfactory_R          |
| <b>Parietal (20)</b> |                                                               |                      |
|                      | Fusiform gyrus (left)                                         | Fusiform_L           |
|                      | Fusiform gyrus (right)                                        | Fusiform_R           |
|                      | Postcentral gyrus (left)                                      | Postcentral_L        |
|                      | Postcentral gyrus (right)                                     | Postcentral_R        |
|                      | Superior parietal gyrus (left)                                | Parietal_Sup_L       |
|                      | Superior parietal gyrus (right)                               | Parietal_Sup_R       |
|                      | Inferior parietal, but supramarginal and angular gyri (left)  | Parietal_Inf_L       |
|                      | Inferior parietal, but supramarginal and angular gyri (right) | Parietal_Inf_R       |
|                      | Supramarginal gyrus (left)                                    | SupraMarginal_L      |
|                      | Supramarginal gyrus (right)                                   | SupraMarginal_R      |
|                      | Angular gyrus (left)                                          | Angular_L            |
|                      | Angular gyrus (right)                                         | Angular_R            |
|                      | Precuneus (left)                                              | Precuneus_L          |
|                      | Precuneus (right)                                             | Precuneus_R          |
|                      | Paracentral lobule (left)                                     | Paracentral_Lobule_L |
|                      | Paracentral lobule (right)                                    | Paracentral_Lobule_R |
|                      | Cuneus (left)                                                 | Cuneus_L             |
|                      | Cuneus (right)                                                | Cuneus_R             |
|                      | Lingual gyrus (left)                                          | Lingual_L            |
|                      | Lingual gyrus (right)                                         | Lingual_R            |

| <b>Occipital (14)</b>  |                                                   |                   |
|------------------------|---------------------------------------------------|-------------------|
|                        | Anterior cingulate and paracingulate gyri (left)  | Cingulum_Ant_L    |
|                        | Anterior cingulate and paracingulate gyri (right) | Cingulum_Ant_R    |
|                        | Median cingulate and paracingulate gyri (left)    | Cingulum_Mid_L    |
|                        | Median cingulate and paracingulate gyri (right)   | Cingulum_Mid_R    |
|                        | Posterior cingulate gyrus (left)                  | Cingulum_Post_L   |
|                        | Posterior cingulate gyrus (right)                 | Cingulum_Post_R   |
|                        | Calcarine fissure and surrounding cortex (left)   | Calcarine_L       |
|                        | Calcarine fissure and surrounding cortex (right)  | Calcarine_R       |
|                        | Superior occipital gyrus (left)                   | Occipital_Sup_L   |
|                        | Superior occipital gyrus (right)                  | Occipital_Sup_R   |
|                        | Middle occipital gyrus (left)                     | Occipital_Mid_L   |
|                        | Middle occipital gyrus (right)                    | Occipital_Mid_R   |
|                        | Inferior occipital gyrus (left)                   | Occipital_Inf_L   |
|                        | Inferior occipital gyrus (right)                  | Occipital_Inf_R   |
| <b>Cerebellum (26)</b> |                                                   |                   |
|                        | Crus I of cerebellar hemisphere (left)            | Cerebelum_Crus1_L |
|                        | Crus I of cerebellar hemisphere (right)           | Cerebelum_Crus1_R |
|                        | Crus II of cerebellar hemisphere (left)           | Cerebelum_Crus2_L |
|                        | Crus II of cerebellar hemisphere (right)          | Cerebelum_Crus2_R |
|                        | Lobule III of cerebellar hemisphere (left)        | Cerebelum_3_L     |
|                        | Lobule III of cerebellar hemisphere (right)       | Cerebelum_3_R     |
|                        | Lobule IV/V of cerebellar hemisphere (left)       | Cerebelum_4_5_L   |
|                        | Lobule IV/V of cerebellar hemisphere (right)      | Cerebelum_4_5_R   |
|                        | Lobule VI of cerebellar hemisphere (left)         | Cerebelum_6_L     |
|                        | Lobule VI of cerebellar hemisphere (right)        | Cerebelum_6_R     |
|                        | Lobule VIIb of cerebellar hemisphere (left)       | Cerebelum_7b_L    |
|                        | Lobule VIIb of cerebellar hemisphere (right)      | Cerebelum_7b_R    |
|                        | Lobule VIII of cerebellar hemisphere (left)       | Cerebelum_8_L     |
|                        | Lobule VIII of cerebellar hemisphere (right)      | Cerebelum_8_R     |

|  |                                            |                |
|--|--------------------------------------------|----------------|
|  | Lobule IX of cerebellar hemisphere (left)  | Cerebelum_9_L  |
|  | Lobule IX of cerebellar hemisphere (right) | Cerebelum_9_R  |
|  | Lobule X of cerebellar hemisphere (left)   | Cerebelum_10_L |
|  | Lobule X of cerebellar hemisphere (right)  | Cerebelum_10_R |
|  | Lobule I/II of vermis                      | Vermis_1_2     |
|  | Lobule III of vermis                       | Vermis_3       |
|  | Lobule IV/V of vermis                      | Vermis_4_5     |
|  | Lobule VI of vermis                        | Vermis_6       |
|  | Lobule VII of vermis                       | Vermis_7       |
|  | Lobule VIII of vermis                      | Vermis_8       |
|  | Lobule IX of vermis                        | Vermis_9       |
|  | Lobule X of vermis                         | Vermis_10      |

## Supplementary Figure legends

**Supplementary Figure S1. Illustration of the EC dynamics using the TPDC approach in (A) MS patients and (B) healthy controls.**

The EC strength dynamic over the acquired resting-state time (600ms) is shown for each of the investigated regions for MS patients and healthy controls, separately.

In MS patients (A) the upper row shows the EC strength dynamic originating from the DGMN, frontal, prefrontal, temporal, parietal and occipital region as well as the cerebellum (arrow on the right side), whereas the lower row shows the EC strength dynamic terminating in the above-mentioned regions (arrow on the left side).

In healthy controls (B), the upper row shows accordingly the EC strength dynamic originating from the seven investigated regions (arrow to the right side), whereas the lower row shows the EC strength dynamic terminating in the seven investigated regions (arrow on the left side).

**A**

# MS patients

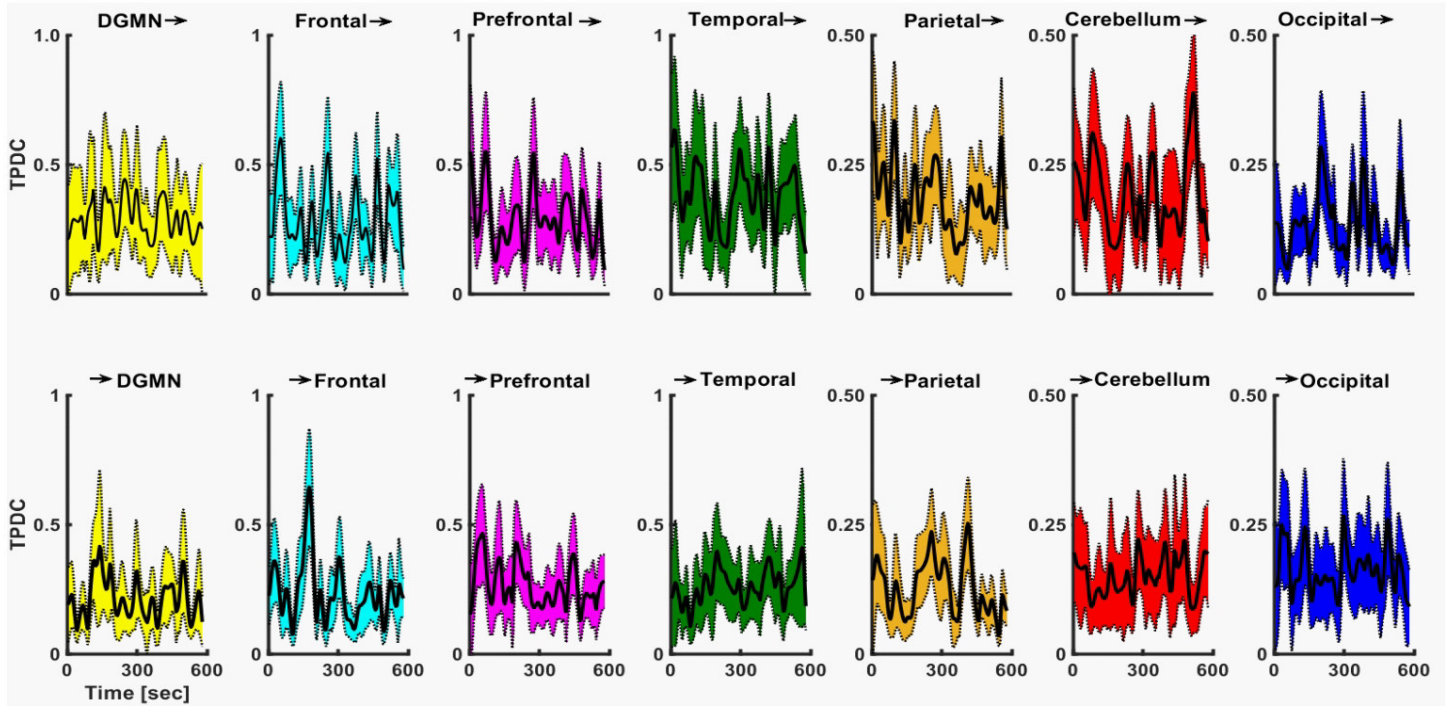**B**

# Healthy controls

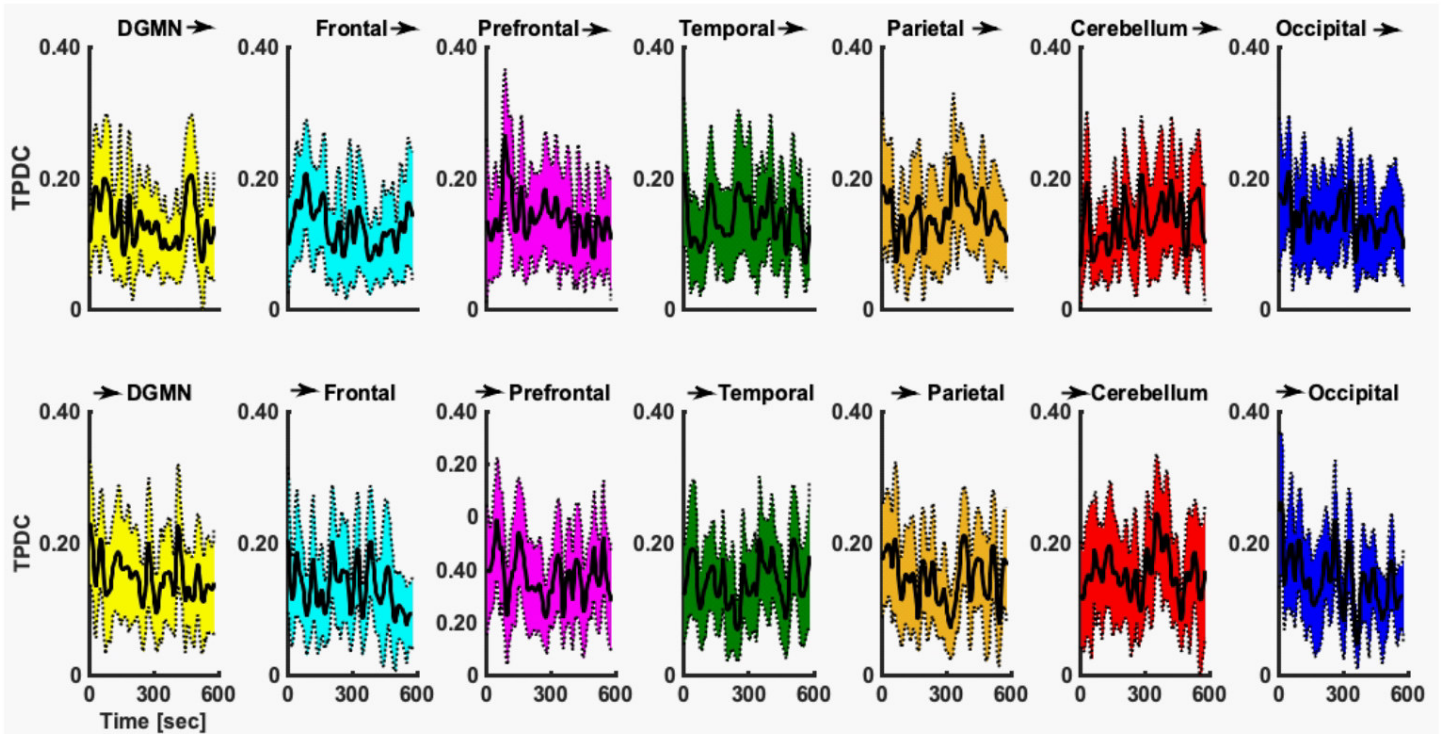



**Supplementary Figure S2a and S2b. The dominant direction and its strength of EC at each time point for MS patients (A) and healthy controls (B).**

The dominant direction (indicated by arrows) and its strength (indicated by different colors) for each time point is shown for each of the seven investigated regions – illustrated separately for MS patients (A) and healthy controls(B).

**A****MS patients**

0 months

3 months

6 months

9 months

12 months

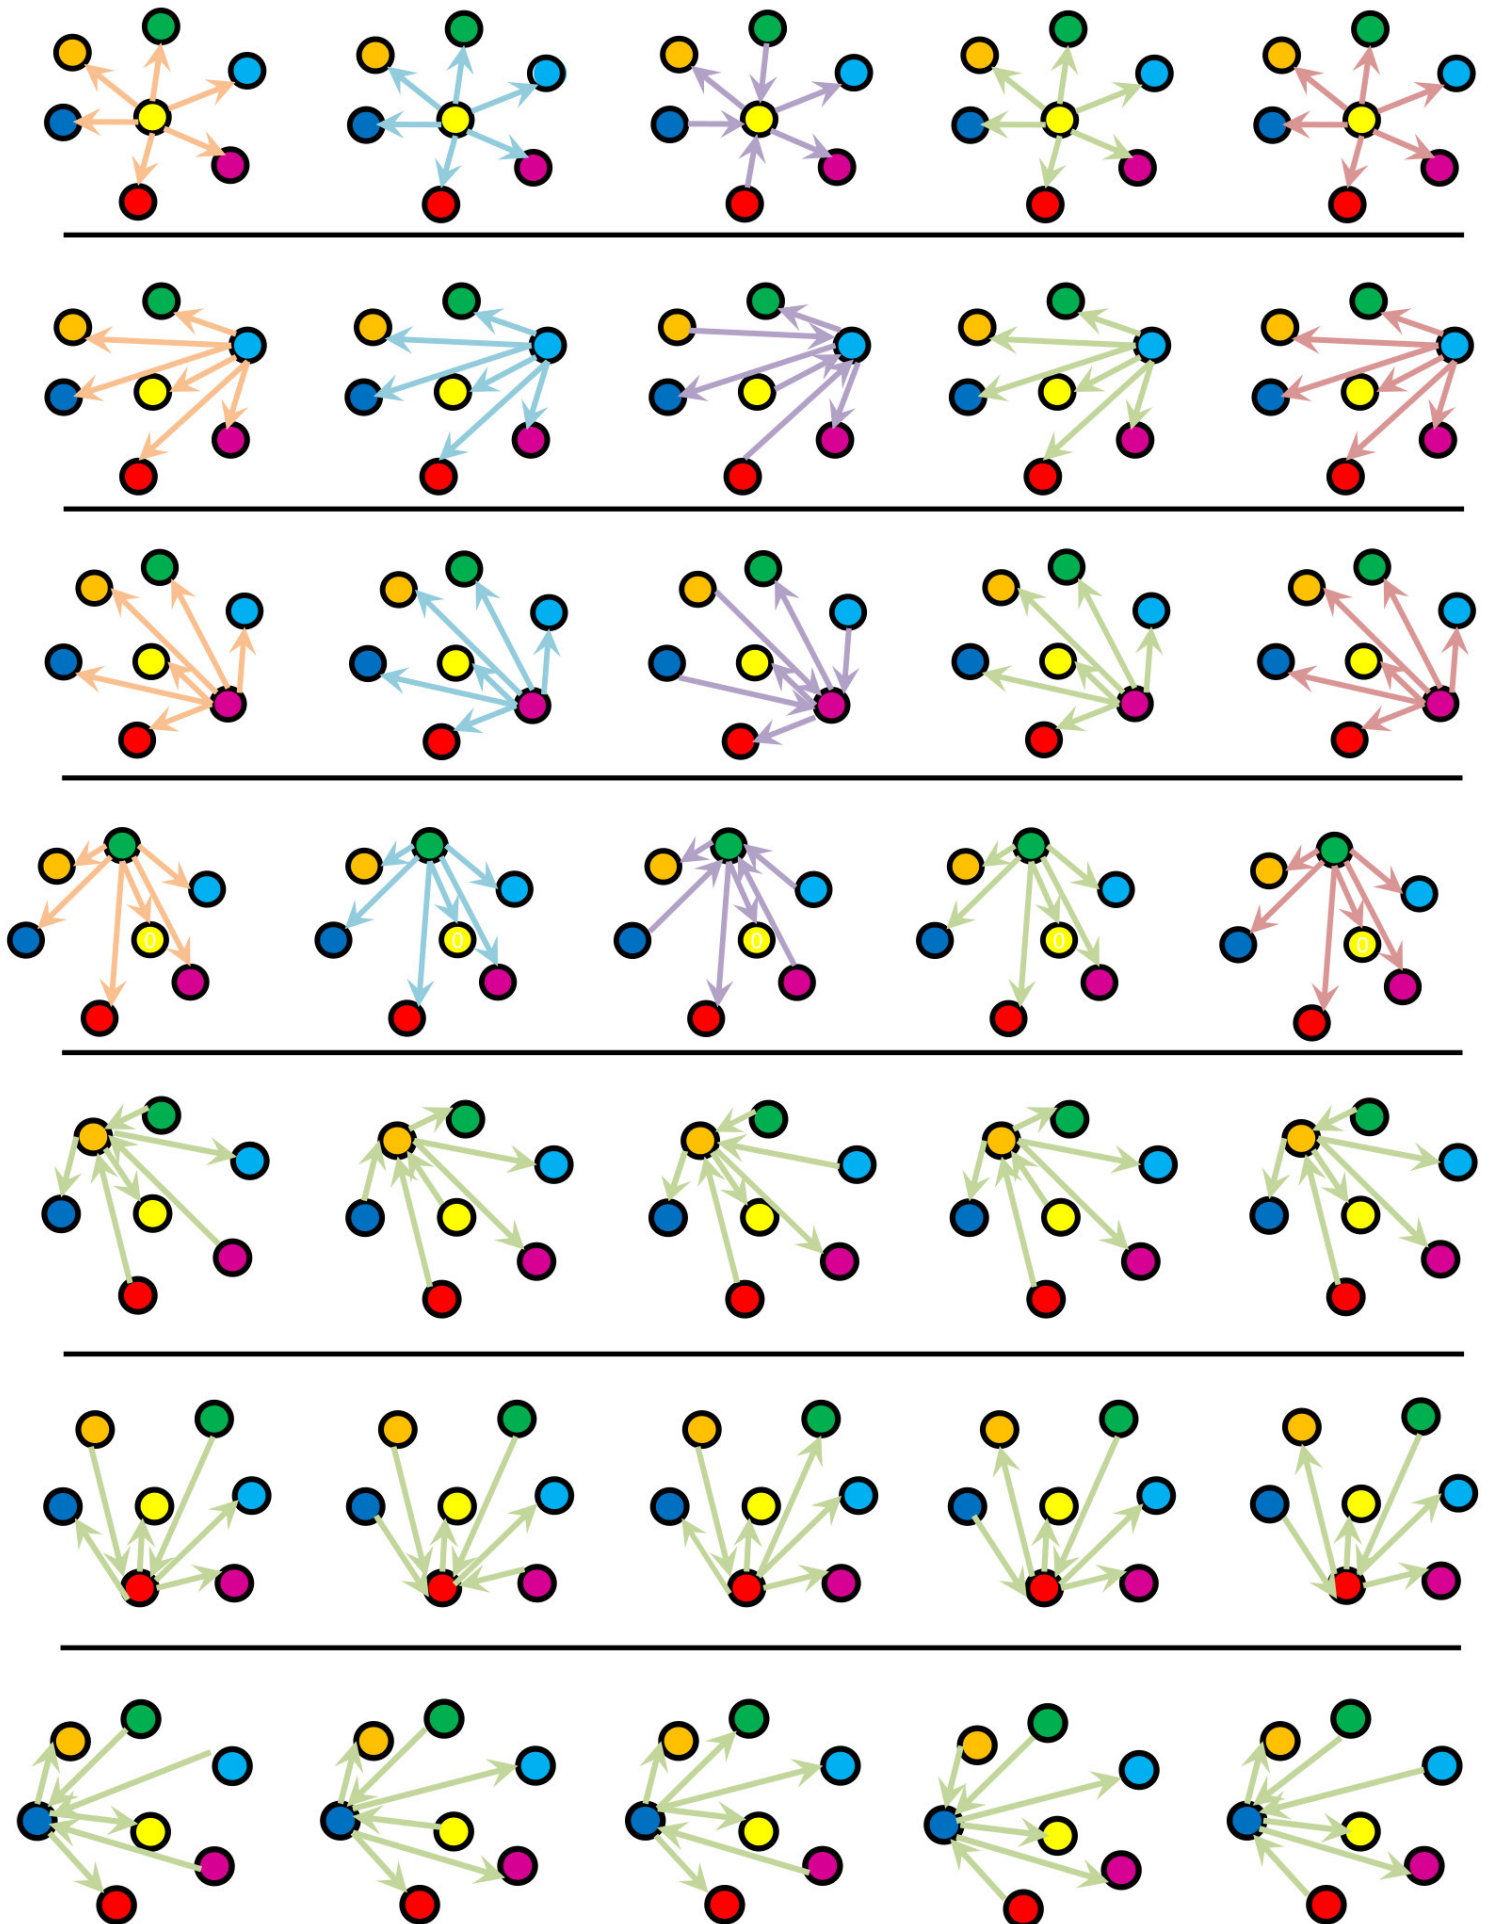

● DGMN   
 ● Frontal   
 ● Prefrontal   
 ● Temporal   
 ● Parietal   
 ● Cerebellum   
 ● Occipital

→ 0.05 to 0.1   
 → 0.1 to 0.15   
 → 0.15 to 0.2   
 → 0.2 to 0.25   
 → 0.25 to 0.3   
 → 0.3 to 0.35   
 → 0.35 to 0.4

# Healthy controls

# B

0 months

12 months

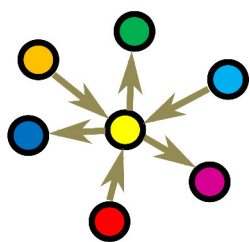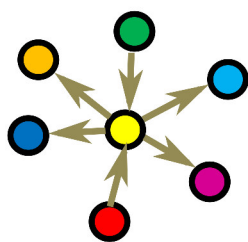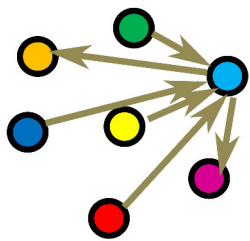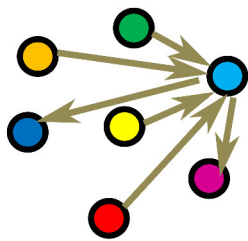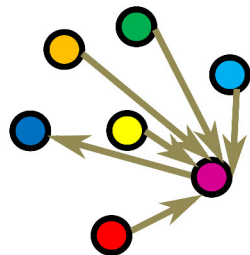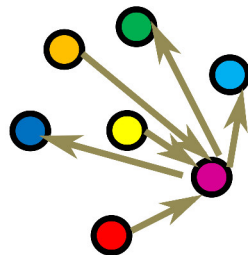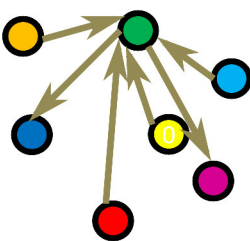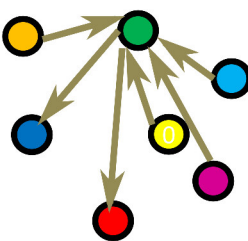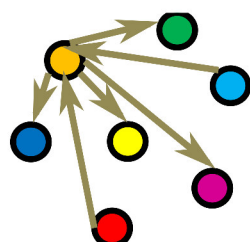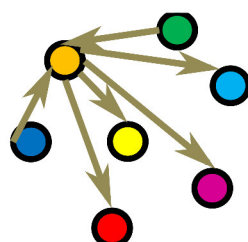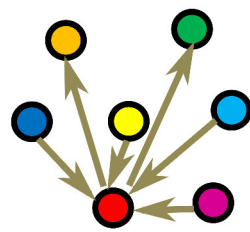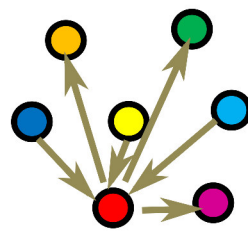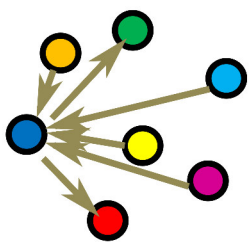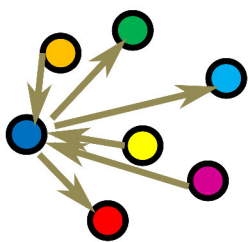

- DGMN
- Frontal
- Prefrontal
- Temporal
- Parietal
- Cerebellum
- Occipital
- 0.05 to 0.1

**Supplementary Figure S3. The correlation analysis with clinical parameters performed with (A) the difference between the baseline and last follow-up and with (B) the standard deviation of EC over time.**

The correlation analysis on the left side (A) corresponds to Figure 4 of the main text and shows the correlation between EDSS, FSMC or disease duration and EC values from MS patients between baseline ( $t_1 = 0$  months) and the last follow-up ( $t_5 = 12$  months) calculated as  $\Delta EC = EC [t_5] - EC [t_1]$ .

The illustration on the right side (B) shows the correlation analysis using the standard deviation of EC over time instead of the above-mentioned approach. Only the positive correlation with disease duration from the temporal region to the DGMN did not reach significance level compared to the approach using the difference between the baseline and last follow-up. The remaining correlation pattern appeared unchanged. This was shown for the EC values derived from both the CBN as well as TPDC analysis.

**A**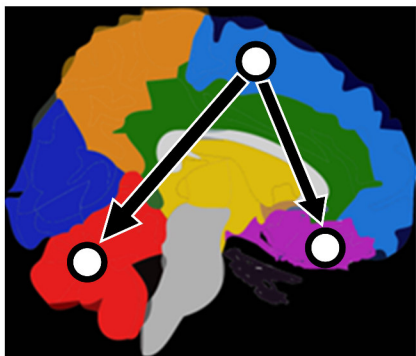

EDSS

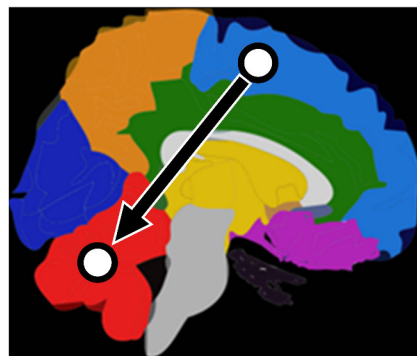

FSMC

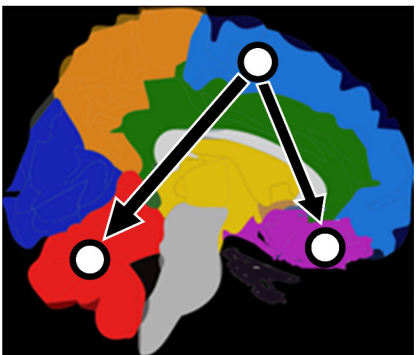

Disease duration

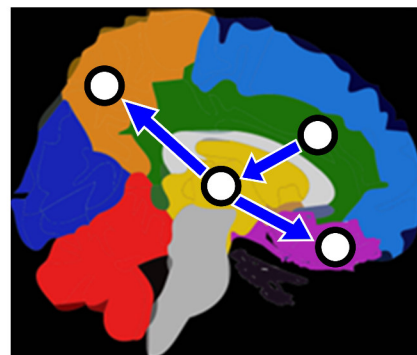

Disease duration

**B**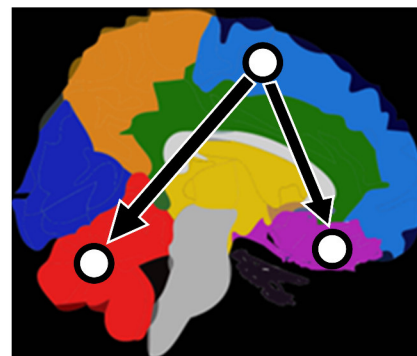

EDSS

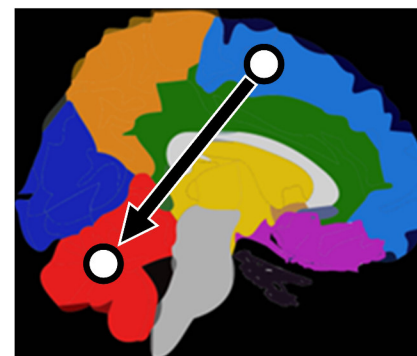

FSMC

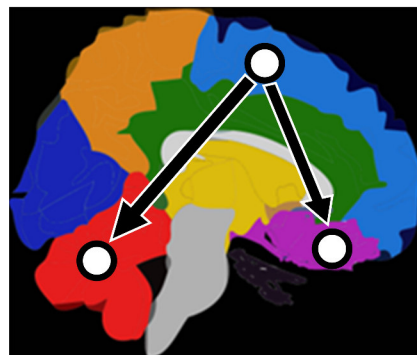

Disease duration

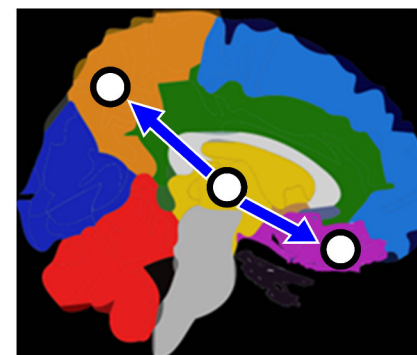

Disease duration

**Supplementary Figure 4. The scatterplots of the correlation analysis between the clinical parameters and the individual effective connectivity (EC) changes illustrated separately for the CBN (A) and TPDC analysis (B).**

Correlation between the Expanded Disability Status Scale (EDSS), Fatigue Scale for Motor and Cognitive functions (FSMC) or disease duration and effective connectivity (EC) values between baseline ( $t_1 = 0$  months) and the last follow-up ( $t_5 = 12$  months) calculated as  $\Delta EC = EC [t_5] - EC [t_1]$ . The corresponding values (correlation coefficients and p-values) are shown in Table 2.

**(A)****CBN**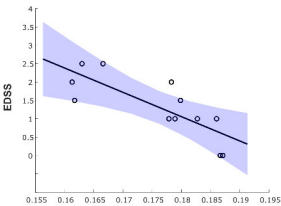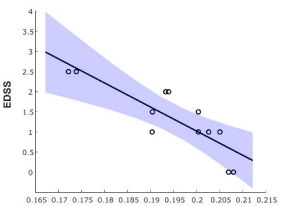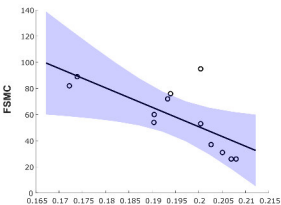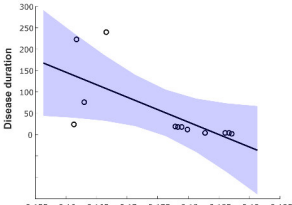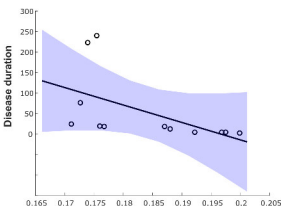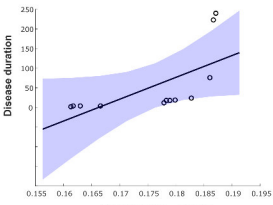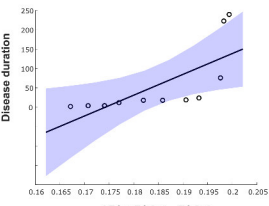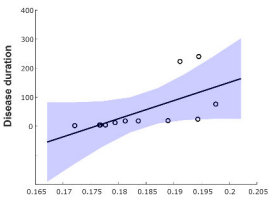**(B)****TPDC**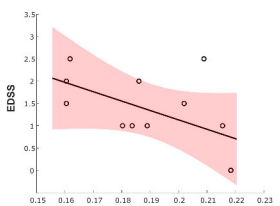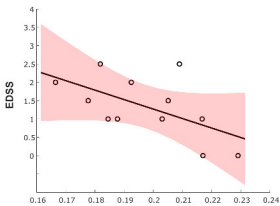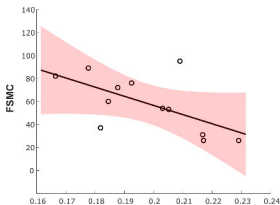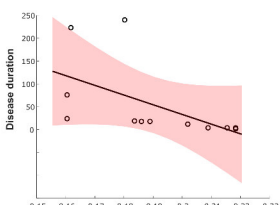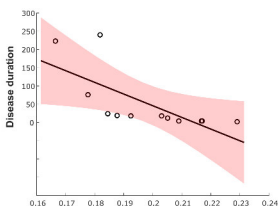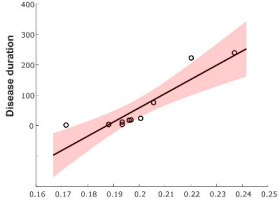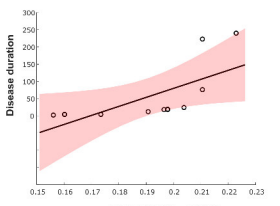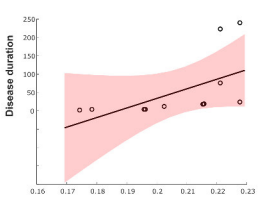

Supplement: MOESM1 [file 41598_2020_57895_MOESM1_ESM.pdf]
